# Supplementary material for: Morphology control via dual solvent crystallization for high-mobility functionalized pentacene-blend thin film transistors
Source: Royal Society of Chemistry journal article supplement (doi:10.1039/c1jm11119a), 2011-01-01
Supplement: c1jm11119a.pdf [file c1jm11119a.pdf]

## Supplementary Data

|                  |         | part (a)                                                                     |                                                                              |                 |                               | part (b)                                                                     |                                                                              |                 |                               |
|------------------|---------|------------------------------------------------------------------------------|------------------------------------------------------------------------------|-----------------|-------------------------------|------------------------------------------------------------------------------|------------------------------------------------------------------------------|-----------------|-------------------------------|
|                  |         | $R_{T-R} = 1$                                                                |                                                                              |                 |                               | $R_{T-R} = 3$                                                                |                                                                              |                 |                               |
| 2nd solvent      | bp (°C) | $\langle\mu_{lin}\rangle$ (cm <sup>2</sup> V <sup>-1</sup> s <sup>-1</sup> ) | $\langle\mu_{sat}\rangle$ (cm <sup>2</sup> V <sup>-1</sup> s <sup>-1</sup> ) | $c_{v,sat}$ (%) | $\langle I_{OFF}\rangle$ (nA) | $\langle\mu_{lin}\rangle$ (cm <sup>2</sup> V <sup>-1</sup> s <sup>-1</sup> ) | $\langle\mu_{sat}\rangle$ (cm <sup>2</sup> V <sup>-1</sup> s <sup>-1</sup> ) | $c_{v,sat}$ (%) | $\langle I_{OFF}\rangle$ (nA) |
| butyl acetate    | 127     | 0.23                                                                         | 0.11                                                                         | 14              | 0.76                          | 0.86                                                                         | 0.55                                                                         | 13              | 0.29                          |
| amyl acetate     | 149     | 0.17                                                                         | 0.07                                                                         | 23              | 53                            | 0.93                                                                         | 0.65                                                                         | 17              | 1.7                           |
| cumene           | 153     | 0.29                                                                         | 0.19                                                                         | 22              | 0.01                          | 0.92                                                                         | 0.60                                                                         | 13              | 0.59                          |
| anisole          | 154     | 0.62                                                                         | 0.45                                                                         | 83              | 1.6                           | 1.33                                                                         | 1.22                                                                         | 27              | 0.99                          |
| mesitylene       | 166     | 0.09                                                                         | 0.05                                                                         | 39              | 43                            | 1.11                                                                         | 0.80                                                                         | 8               | 0.85                          |
| 4-methyl anisole | 174     | 0.33                                                                         | 0.09                                                                         | 18              | 1.4                           | 1.08                                                                         | 0.86                                                                         | 12              | 0.26                          |
| indan            | 176     | 0.06                                                                         | 0.06                                                                         | 84              | 36                            | 0.96                                                                         | 0.63                                                                         | 7               | 0.56                          |

5.6E-10

**Table S1.** Results of average linear mobility,  $\langle\mu_{lin}\rangle$ , saturation mobility,  $\langle\mu_{sat}\rangle$ , and off-current,  $\langle I_{OFF}\rangle$ , for TFT devices prepared from TIPS-pentacene:PS blends based on single (mesitylene) and dual solvent solutions (mesitylene and 2nd solvent). The parameter,  $c_{v,sat}$  (%), is the coefficient of variation of each data set of saturation mobilities, i.e. the ratio of the standard deviation to the mean,  $\langle\mu_{sat}\rangle$ . Statistics are from six random devices. Part (a) shows device performance from stock solutions mixed in ratio  $R_{T-R} = 1$  and part (b) from  $R_{T-R} = 3$

Statistics of terrace heights for surface morphology of typical TIPS-pentacene:PS film deposited from mesitylene-anisole solutions with  $R_{T-R} = 3$  (Fig. 5a)

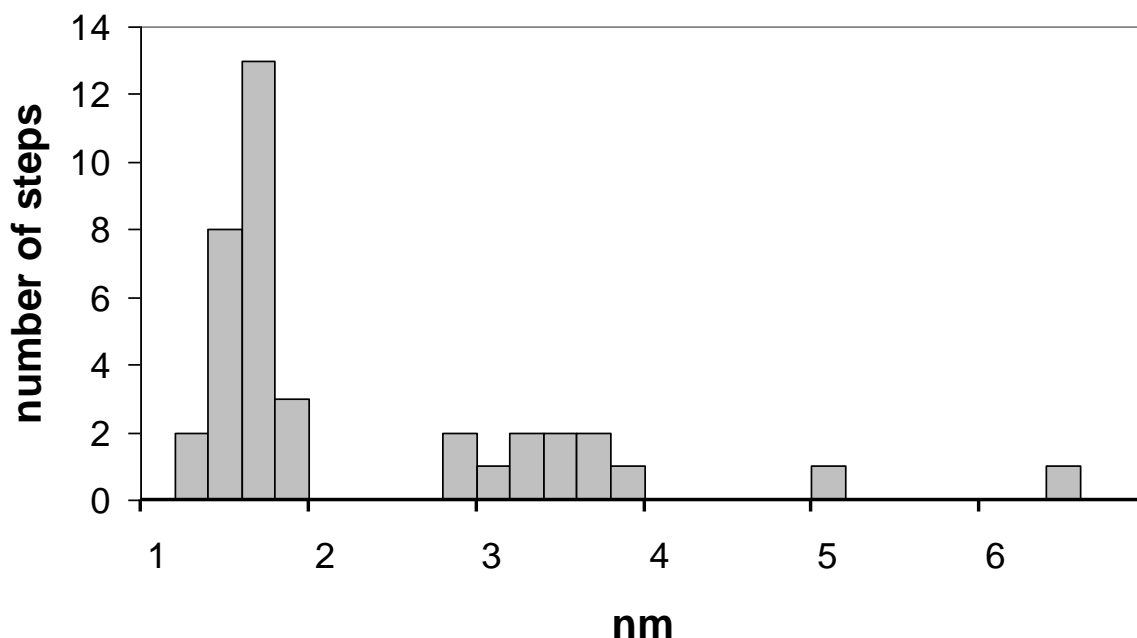

**Figure S1.** Histogram of the number of plateau height differentials identified in cross sectional analysis of AFM height scans (eg. Fig. 5a). A plateau was defined as a cross-sectional region with height variation  $< 5\%$ . A total of 43 plateaus are used for the frequency distribution with bin size of 0.2nm. The data show a peak around  $d \sim 1.6$  nm and 3.4 nm,

5.1 nm and 6.5 nm. Assuming that this is due to a series of monolayers, with variations due to random sources of small errors, the lattice unit was calculated as  $\langle d \rangle = 1.64 \pm 0.04$  nm.
